# Supplementary material for: Correlation of domain-specific physical activity with stroke: a population-based study
Source: Research Square preprint supplement (doi:10.21203/rs.3.rs-7549863/v1), 2025-10-21
Supplement: Supplementary file 1 [file accc23f5f479a4b0299f1435.docx]

**Correlation of domain-specific physical activity with stroke: a population-based study**

**Table S1.** The physical activity questionnaire based on the Global Physical Activity Questionnaire

| **Variable** | **Description** | **Answers** |
| --- | --- | --- |
| **Specific GPAQ questions used to assess occupation-related physical activity** | | |
| **Vigorous work activity = yes (%)+** | Next I am going to ask you about the time {you spend/SP spends} doing different types of physical activity in a typical week. Please answer these questions even if {you do not consider yourself/SP does not consider himself/herself} to be a physically active person. Think first about the time {you spend/SP spends} doing work. Think of work as the things that {you have/SP has} to do such as paid or unpaid work, studying or training, household chores, and yard work. In answering the following questions, 'vigorous-intensity activities' are activities that require hard physical effort and cause large increases in breathing or heart rate, and 'moderate-intensity activities' are activities that require moderate physical effort and cause small increases in breathing or heart rate. Does {your/SP's} work involve vigorous-intensity activity that causes large increases in breathing or heart rate like carrying or lifting heavy loads, digging or construction work for at least 10 minutes continuously? | Yes, no |
| **Days vigorous work (%)+** | PROBE IF NEEDED: Vigorous-intensity activity causes large increases in breathing or heart rate and is done for at least 10 minutes continuously. (SP interview version) HARD EDIT: 1-7. (MEC interview version) HARD EDIT: Less than 1 day or more than 7 days. Error Message: The number of days should be between 1 and 7. ENTER NUMBER OF DAYS | Range of values |
| **Minutes vigorous intensity work (%)+** | ROBE IF NEEDED: Think about a typical day when you do vigorous-intensity activities during your work. PROBE IF NEEDED: Vigorous-intensity activity causes large increases in breathing or heart rate and is done for at least 10 minutes continuously. (SP interview version) SOFT EDIT: >4 HOURS. SOFT EDIT WORDING: INTERVIEWER, YOU HAVE RECORDED THAT THE SP SPENDS MORE THAN 4 HOURS DOING VIGOROUS-INTENSITY ACTIVITIES AT WORK ON A TYPICAL DAY. PLEASE CONFIRM WITH SP THAT OVER 4 HOURS IS CORRECT. HARD EDIT: >24 HOURS. HARD EDIT: <10 MINUTES. ENTER NUMBER OF MINUTES OR HOURS (MEC interview version) SOFT EDIT: >4 hours. Error Message: INTERVIEWER, YOU HAVE RECORDED THAT THE SP SPENDS MORE THAN 4 HOURS DOING VIGOROUS-INTENSITY ACTIVITIES AT WORK ON A TYPICAL DAY. PLEASE CONFIRM WITH SP THAT OVER 4 HOURS IS CORRECT. HARD EDIT: Less than 10 minutes or 24 hours or more. Error Message: The time should be 10 minutes or more, but less than 24 hours. ENTER NUMBER (OF MINUTES OR HOURS) | Range of values |
| **Moderate work activity = yes (%)+** | Does {your/SP's} work involve moderate-intensity activity that causes small increases in breathing or heart rate such as brisk walking or carrying light loads for at least 10 minutes continuously? | Yes, no |
| **Number of days moderate work (%)+** | PROBE IF NEEDED: Moderate-intensity activity causes small increases in breathing or heart rate and is done for at least 10 minutes continuously. (SP interview version) HARD EDIT: 1-7. ENTER NUMBER OF DAYS. (MEC interview version) HARD EDIT: Less than 1 day or more than 7 days Error Message: The number of days should be between 1 and 7. ENTER NUMBER OF DAYS | Range of values |
| **Minutes moderate intensity work (%)+** | PROBE IF NEEDED: Think about a typical day when you do moderate-intensity activities during your work. PROBE IF NEEDED: Moderate-intensity activity causes small increases in breathing or heart rate and is done for at least 10 minutes continuously. (SP interview version) SOFT EDIT: >4 HOURS. SOFT EDIT WORDING: INTERVIEWER, YOU HAVE RECORDED THAT THE SP SPENDS MORE THAN 4 HOURS DOING MODERATE-INTENSITY ACTIVITIES AT WORK ON A TYPICAL DAY. PLEASE CONFIRM WITH SP THAT OVER 4 HOURS IS CORRECT. HARD EDIT: >24 HOURS. HARD EDIT: <10 MINUTES. ENTER NUMBER OF MINUTES OR HOURS (MEC interview version) SOFT EDIT: >4 hours. Error Message: INTERVIEWER, YOU HAVE RECORDED THAT THE SP SPENDS MORE THAN 4 HOURS DOING MODERATE-INTENSITY ACTIVITIES AT WORK ON A TYPICAL DAY. PLEASE CONFIRM WITH SP THAT OVER 4 HOURS IS CORRECT. HARD EDIT: Less than 10 minutes or 24 hours or more. Error Message: The time should be 10 minutes or more, but less than 24 hours. ENTER NUMBER (OF MINUTES OR HOURS) | Range of values |
| **Specific GPAQ questions used to assess transportation-related physical activity** | | |
| **Walk or bicycle = yes (%)+** | The next questions exclude the physical activity of work that you have already mentioned. Now I would like to ask you about the usual way {you travel/SP travels} to and from places. For example, to work, for shopping, to school. {Do you/Does SP} walk or use a bicycle for at least 10 minutes continuously to get to and from places? | Yes, no |
| **Number of days walk or bicycle (%)+** | (SP interview version) HARD EDIT: 1-7. ENTER NUMBER OF DAYS (MEC interview version) HARD EDIT: Less than 1 day or more than 7 days Error Message: The number of days should be between 1 and 7. ENTER NUMBER OF DAYS | Range of values |
| **Minutes walk bicycle for transportation (%)+** | PROBE IF NEEDED: Think about a typical day when you walk or bicycle for travel. (SP interview version) SOFT EDIT: >4 HOURS. SOFT EDIT WORDING: INTERVIEWER, YOU HAVE RECORDED THAT THE SP SPENDS MORE THAN 4 HOURS WALKING OR BICYCLING TO GET TO AND FROM PLACES ON A TYPICAL DAY. PLEASE CONFIRM WITH SP THAT OVER 4 HOURS IS CORRECT. HARD EDIT: >24 HOURS. HARD EDIT: <10 MINUTES. ENTER NUMBER OF MINUTES OR HOURS (MEC interview version) SOFT EDIT: >4 hours. Error Message: INTERVIEWER, YOU HAVE RECORDED THAT THE SP SPENDS MORE THAN 4 HOURS WALKING OR BICYCLING TO GET TO AND FROM PLACES ON A TYPICAL DAY. PLEASE CONFIRM WITH SP THAT OVER 4 HOURS IS CORRECT. HARD EDIT: Less than 10 minutes or 24 hours or more. Error Message: The time should be 10 minutes or more, but less than 24 hours. ENTER NUMBER (OF MINUTES OR HOURS) | Range of values |
| **Specific GPAQ questions used to assess leisure-time physical activity** | | |
| **Vigorous recreational activities = yes (%)+** | The next questions exclude the work and transportation activities that you have already mentioned. Now I would like to ask you about sports, fitness and recreational activities. {Do you/Does SP} do any vigorous-intensity sports, fitness, or recreational activities that cause large increases in breathing or heart rate like running or basketball for at least 10 minutes continuously? | Yes, no |
| **Days vigorous recreational activities (%)+** | PROBE IF NEEDED: Vigorous-intensity activity causes large increases in breathing or heart rate and is done for at least 10 minutes continuously. (SP interview version) HARD EDIT: 1-7. ENTER NUMBER OF DAYS (MEC interview version) HARD EDIT: Less than 1 day or more than 7 days Error Message: The number of days should be between 1 and 7. ENTER NUMBER OF DAYS | Range of values |
| **Minutes vigorous recreational activities (%)+** | PROBE IF NEEDED: Think about a typical day when you do vigorous-intensity sports, fitness or recreational activities. (SP interview version) SOFT EDIT: >4 HOURS. SOFT EDIT WORDING: INTERVIEWER, YOU HAVE RECORDED THAT THE SP SPENDS MORE THAN 4 HOURS DOING VIGOROUS-INTENSITY RECREATIONAL ACTIVITIES ON A TYPICAL DAY. PLEASE CONFIRM WITH SP THAT OVER 4 HOURS IS CORRECT. HARD EDIT: >24 HOURS. HARD EDIT: <10 MINUTES. ENTER NUMBER OF MINUTES OR HOURS (MEC interview version) SOFT EDIT: >4 hours. Error Message: INTERVIEWER, YOU HAVE RECORDED THAT THE SP SPENDS MORE THAN 4 HOURS DOING VIGOROUS-INTENSITY RECREATIONAL ACTIVITIES ON A TYPICAL DAY. PLEASE CONFIRM WITH SP THAT OVER 4 HOURS IS CORRECT. HARD EDIT: Less than 10 minutes or 24 hours or more. Error Message: The time should be 10 minutes or more, but less than 24 hours. ENTER NUMBER (OF MINUTES OR HOURS) | Range of values |
| **Moderate recreational activities = yes (%)+** | {Do you/Does SP} do any moderate-intensity sports, fitness, or recreational activities that cause a small increase in breathing or heart rate such as brisk walking, bicycling, swimming, or golf for at least 10 minutes continuously? | Yes, no |
| **Days moderate recreational activities (%)+** | PROBE IF NEEDED: Moderate-intensity sports, fitness or recreational activities cause small increases in breathing or heart rate and is done for at least 10 minutes continuously. (SP interview version) HARD EDIT: 1-7. ENTER NUMBER OF DAYS (MEC interview version) HARD EDIT: Less than 1 day or more than 7 days Error Message: The number of days should be between 1 and 7. ENTER NUMBER OF DAYS | Range of values |
| **Minutes moderate recreational activities (%)+** | PROBE IF NEEDED: Think about a typical day when you do moderate-intensity sports, fitness or recreational activities. PROBE IF NEEDED: Moderate-intensity sports, fitness or recreational activities cause small increases in breathing or heart rate and is done for at least 10 minutes continuously. (SP interview version) SOFT EDIT: >4 HOURS. SOFT EDIT WORDING: INTERVIEWER, YOU HAVE RECORDED THAT THE SP SPENDS MORE THAN 4 HOURS DOING MODERATE-INTENSITY RECREATIONAL ACTIVITIES ON A TYPICAL DAY. PLEASE CONFIRM WITH SP THAT OVER 4 HOURS IS CORRECT. HARD EDIT: >24 HOURS. HARD EDIT: <10 MINUTES. ENTER NUMBER OF MINUTES OR HOURS (MEC interview version) SOFT EDIT: >4 hours. Error Message: INTERVIEWER, YOU HAVE RECORDED THAT THE SP SPENDS MORE THAN 4 HOURS DOING MODERATE-INTENSITY RECREATIONAL ACTIVITIES ON A TYPICAL DAY. PLEASE CONFIRM WITH SP THAT OVER 4 HOURS IS CORRECT. HARD EDIT: Less than 10 minutes or 24 hours or more. Error Message; The time should be 10 minutes or more, but less than 24 hours. ENTER NUMBER (OF MINUTES OR HOURS) | Range of values |
